1 **The universal mechanism of intermediate filament transport.**

2

3 Amélie Robert<sup>1</sup>, Peirun Tian<sup>1</sup>, Stephen A. Adam<sup>1</sup>, Robert D. Goldman<sup>1</sup> and Vladimir I. Gelfand<sup>1\*</sup>

4

5 <sup>1</sup>Department of Cell and Molecular Biology, Feinberg School of Medicine, Northwestern

6 University, Chicago, IL 60611, USA.

7

8 **\*Corresponding author.**

9 Address: Department of Cell and Molecular Biology, Feinberg School of Medicine,

10 Northwestern University, 303 E. Chicago Ave. Ward 11-100, Chicago, IL 60611-3008

11 E-mail address: [vgelfand@northwestern.edu](mailto:vgelfand@northwestern.edu)

12 Phone: (312) 503-0530

13 Fax: (312) 503-7912

14

15

16 **ABSTRACT**

17 Intermediate filaments (IFs) are a major component of the cytoskeleton that regulates a wide  
18 range of physiological properties in eukaryotic cells. In motile cells, the IF network has to adapt  
19 to constant changes of cell shape and tension. In this study, we used two cell lines that express  
20 vimentin and keratins 8/18 to study the dynamic behavior of these IFs. We demonstrated that  
21 both IF types undergo extensive transport along microtubules. This was an unexpected result as  
22 keratin filament remodeling has been described to depend on actin dynamics. We established the  
23 role of kinesin-1 in vimentin and keratin IF transport by knocking out KIF5B, the ubiquitous  
24 isoform of kinesin-1. Futhermore, we demonstrated that unlike typical membrane cargoes,  
25 transport of both types of IFs does not involve kinesin light chains, but requires the presence of  
26 the same region of the kinesin-1 tail, suggesting a unified mechanism of IF transport.

27

28

29

## 30 INTRODUCTION

31 Depending on the tissue or cellular context, cells face different physiological and mechanical  
32 challenges that can be overcome by the cell- and tissue-specific expression of one or a  
33 combination of some of the 70 genes encoding intermediate filament proteins in human. For  
34 example mesenchymal cells typically express high levels of type III vimentin IF (VIF), the  
35 assembly and disassembly of which facilitate different aspects of cell migration (1-4). In contrast  
36 epithelial cells express a combination of type I and type II keratin IFs that are connected to  
37 desmosomes and hemidesmosomes to ensure the tight connection between cells in the epithelial  
38 sheet and between the cells and the basal membrane (5)

39  
40 To accommodate constant changes of cell shape as cells contract, migrate or invade, IFs need to  
41 undergo profound and constant reorganization (reviewed in (6)). This reorganization is achieved  
42 by a combination of severing and re-annealing (7, 8) as well as intracellular translocation of  
43 mature IFs and their precursors. The first indication that IFs could be a cargo for microtubule-  
44 based motors came from the microinjection of pan-kinesin antibody that induced the retraction of  
45 the vimentin network (9). With the development of fluorescent probes and advanced live cell  
46 imaging techniques, several types of cytoplasmic IFs have been observed to move along  
47 microtubule tracks. Movement of neurofilaments has been observed in axons of cultured neurons  
48 (10). Our previous studies have shown that vimentin particles as well as mature filaments are  
49 transported along microtubules (8, 11, 12). Recently, GFAP and nestin IFs were also reported to  
50 move together with vimentin in migrating astrocytes (13). Among the 40 kinesins in mammals,  
51 the major microtubule motor kinesin-1 has been typically suggested to be involved in IF  
52 transport. Kinesin-1 in mammals is represented by three isoforms, KIF5A, KIF5B or KIF5C,

53 with KIF5B being the most abundant ubiquitous version. Several reports suggested that various  
54 types of cytoplasmic IFs might be potential cargo for kinesin-1. In axons for example,  
55 neurofilaments are transported by KIF5A (14, 15), while in muscle, KIF5B has been reported to  
56 be essential for the delivery of desmin and nestin IFs to the growing tip of myotubes (16).  
57 Recently, knock down of *KIF5B* has been shown to reduce anterograde transport of IFs in  
58 migrating astrocytes (13).

59

60 Obviously absent from this list are the most abundant IFs present in epithelial cells, keratin IF.  
61 For these filaments, a different mode of transport based on actin dynamics has been proposed. In  
62 this model, keratin IFs undergo a constant cycle of assembly and disassembly that involves actin-  
63 dependent centripetal motion of keratin particles and filaments from the cell periphery, where  
64 filament particles are formed, to the perinuclear region. When filaments reach the perinuclear  
65 region, a fraction of keratin subunits are released and returned by diffusion to the cell periphery  
66 where another cycle of particle formation takes place (17-20). Although microtubule-dependent  
67 motion of keratin particles has been observed previously (21, 22), the contribution of  
68 microtubules and/or microtubule-based motors for keratin filament dynamics has been neglected  
69 as the rapid transport of fully polymerized keratin filaments has never been reported.

70 In this work, we used a combination of photoconversion experiments and CRISPR/Cas9 genome  
71 editing of *KIF5B* to compare the dynamics of keratin and vimentin IFs and the role of  
72 microtubules and microtubule motors. Surprisingly, we found that the dynamic properties of both  
73 classes of IFs include transport of long mature filaments along microtubules by kinesin-1 and the  
74 same domain of the kinesin tail is involved in transport, strongly suggesting that all types of IFs  
75 move along microtubules using an identical mechanism.

## 76 **RESULTS**

### 77 **Vimentin intermediate filaments are transported along microtubules by kinesin-1.**

78 Kinesin antibody injection and shRNA knock down experiments have suggested a role for  
79 kinesin-1 in vimentin IF transport (9, 13). In humans, kinesin-1 heavy chain is encoded by three  
80 genes; *KIF5A*, *KIF5B* and *KIF5C*. We used CRISPR/cas9 genome-editing to KO *KIF5B*, the  
81 major gene coding for kinesin-1 in RPE cells. Several clones were amplified and the KO was  
82 verified using western blot analysis with an antibody (CT) directed against a peptide in the tail  
83 domain of kinesin heavy chain common to all three isoforms of kinesin-1. Two of the clones  
84 were selected for further analysis. The specificity of the KO was further confirmed using a blot  
85 with an antibody (HD) that recognizes the motor domains of multiple kinesins. This blot  
86 demonstrated that only the band corresponding to kinesin-1 was absent from the lysates of the  
87 KO cells (Figure 1B). We checked the functional implications of *KIF5B* KO by analyzing the  
88 distribution and motility of known kinesin cargos. As expected, *KIF5B* KO induced the  
89 retraction of mitochondria from the cell periphery as described previously ((23), Figure S2 AB).  
90 In contrast, the motility of lysosomes was not affected (Figure S2C), as lysosome transport is  
91 driven, not only by kinesin-1, but by multiples kinesins (Reviewed in (24)).

92 We performed vimentin immunostaining to determine how the absence of kinesin-1 impacts  
93 vimentin filament distribution. In control cells, the vimentin filament network extended all the  
94 way to the cell periphery as delineated by actin staining. In contrast, in the absence of *KIF5B* the  
95 majority of the mature vimentin filaments retracted from the leading edge, with only a few short  
96 IF and non-filamentous particles left behind (Figure 1A). We quantified the results using the  
97 procedure described in Figure S1, and confirmed the initial visual observation that the KO of  
98 *KIF5B* correlated with the retraction of the vimentin network towards the nucleus (Figure, 1C).

99 To confirm that this phenotype was not due to an off-target effect, we performed a rescue  
100 experiment using a mouse version of KIF5B (*mKif5b*), which is insensitive to the gRNA used to  
101 KO human *KIF5B*. When mKif5b-Emerald was expressed in RPE *KIF5B* KO cells, the vimentin  
102 filament network distribution was fully restored, demonstrating that the retraction of the network  
103 was indeed caused by the absence of kinesin-1 (Figure 1A, third column). This result  
104 corroborates other observations (9, 11, 13) suggesting that vimentin is a kinesin-1 cargo.

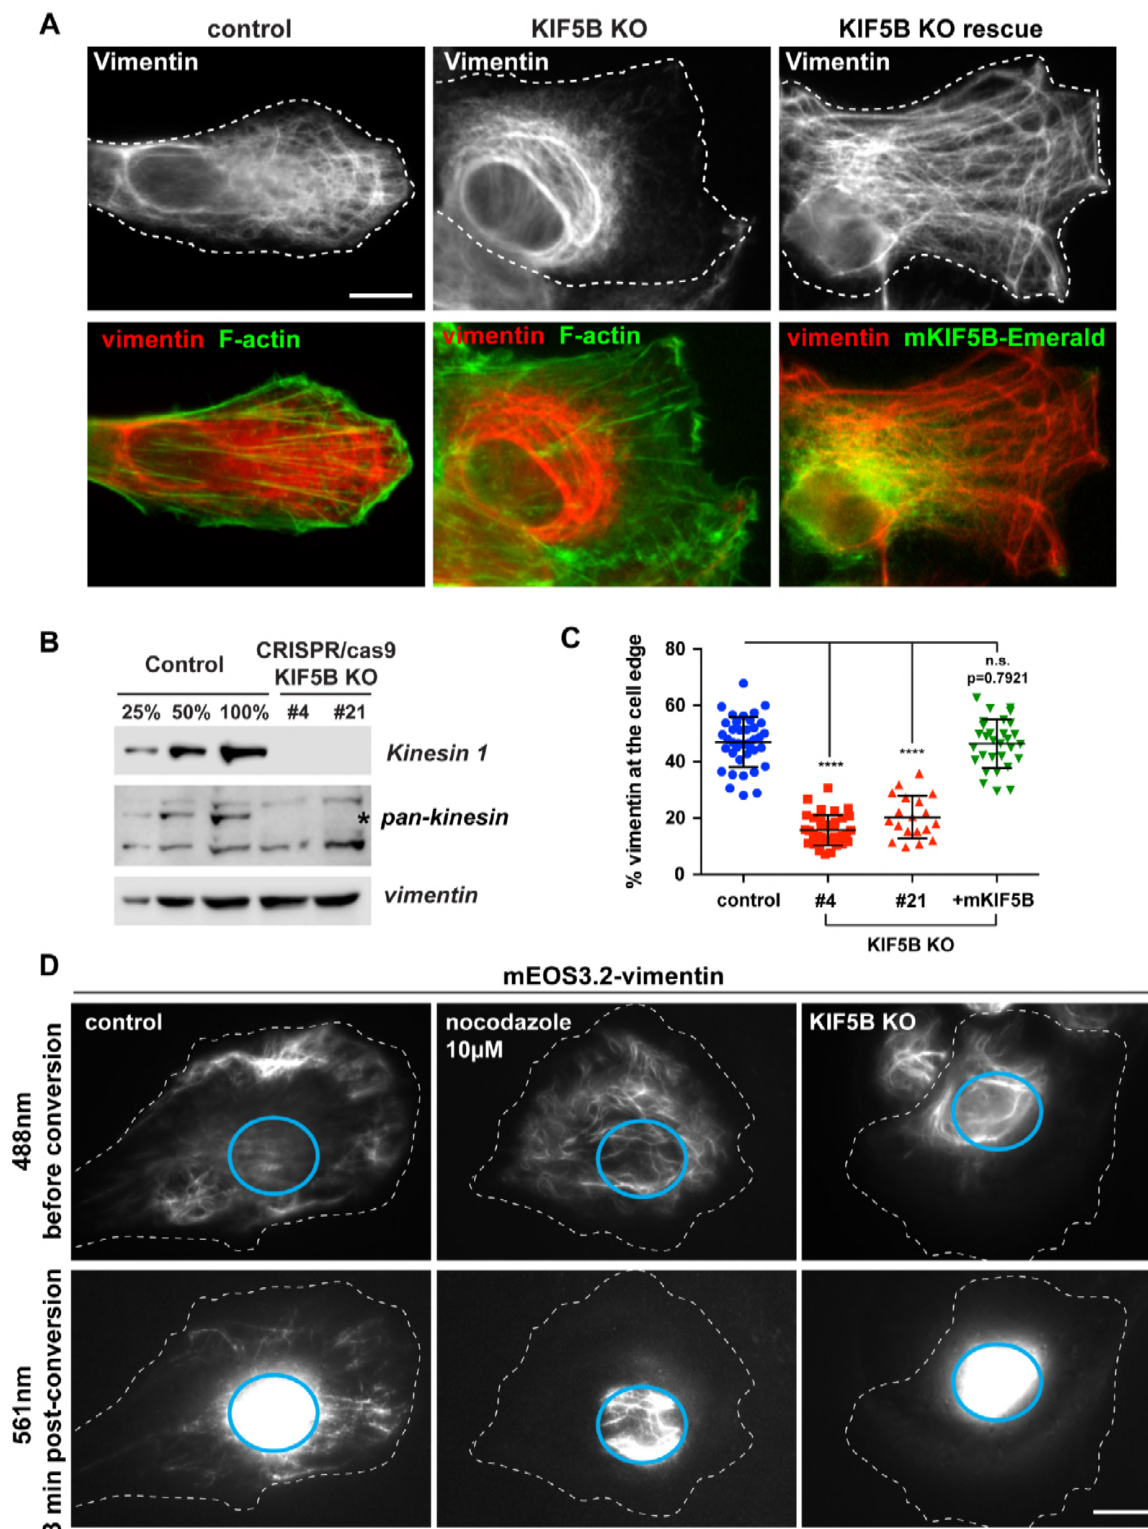

105

106 *Figure 1. KIF5B KO affects vimentin IF distribution and inhibits their transport*

107 *A) Control and KIF5B KO cells were fixed and co-stained for vimentin and F-actin. The last*  
108 *column shows the rescue of vimentin distribution in a KIF5B KO cell by mKif5b-Emerald*  
109 *expression. B) Western blot analyses using kinesin-1 antibody shows the absence of kinesin-1 in*  
110 *two different KIF5B CRISPR clones. Pan-kinesin antibody shows the specificity of the KO for*  
111 *kinesin-1 (position marked by the star), but not the other kinesin family members. Vimentin is*  
112 *used as loading control. C) Graph shows the % of vimentin at the cell edge (Mean with SD; n*  
113 *>30 cells, except KIF5B KO #21 n=19). Data are representative of at least two independent*  
114 *experiments (see Materials and Methods for quantification details). Statistical significance was*  
115 *determined using the Mann-Whitney test (\*\*\*\*; p<0.0001). D) Photoconversion of mEos3.2-*  
116 *vimentin in RPE cell. mEos3.2-vimentin was photoconverted from green to red at the cell center*  
117 *(cyan circle) and the dynamics of photoconverted filaments was imaged using TIRF microscopy.*  
118 *The top panels show the vimentin network in the green channel (488nm) before photoconversion*  
119 *and the bottom panels show the red channel (561nm) 3 minutes after photoconversion. Note the*  
120 *presence of several photoconverted filaments outside of the original photoconverted zone in the*  
121 *control cell; photoconverted filaments are confined inside the initial zone after microtubule*  
122 *depolymerization with nocodazole (10 $\mu$ M for 3 hrs) in KIF5B KO cells. Bars, 10 $\mu$ m.*

123 We have previously visualized vimentin filaments transported along microtubules in RPE cells  
124 (8). To directly demonstrate that this transport is powered by kinesin-1, we used photoconversion  
125 of mEos3.2-vimentin (8). The emission of mEos3.2 changes from green to red when exposed to  
126 ultraviolet (UV) light at 400 nm. By restricting photoconversion to a circular area of about 10  
127  $\mu$ m in diameter, we produced fiduciary marks on filaments permitting us to monitor their  
128 transport in regions of cells with high filament density. Photoconverted mEos3.2-vimentin was  
129 imaged over a period of 3 min using TIRF microscopy. As described before (8), photoconverted



130 filaments robustly moved away from the central photoconverted area (Figure 1D, left panel and  
131 Supplemental Video S1). When cells were treated with 10 $\mu$ M nocodazole for 3 hrs to  
132 depolymerize microtubules, vimentin filament transport was completely inhibited (Figure 1D,  
133 middle panels). To determine if the microtubule-dependent transport is driven by kinesin-1,  
134 mEos3.2 vimentin was expressed in RPE *KIF5B* KO cells and the same photoconversion  
135 experiment was performed. No converted filaments could be detected outside of the area of  
136 initial photoconversion for 3 min (Figure 1D, right panels, Supplemental Video S2). This result is  
137 consistent with the effect of *KIF5B* KO on vimentin distribution, further demonstrating that  
138 kinesin-1 is the motor that drives transport of vimentin IFs along microtubules.

139

#### 140 **Keratin intermediate filaments are transported along microtubules by kinesin-1.**

141 The role of the actin cytoskeleton in the cycle of keratin assembly/disassembly has been  
142 described in great details (Reviewed in (25)). However, even though microtubule-dependent  
143 motion of keratin particles has been observed previously (21, 22), the role of microtubules in the  
144 transport of keratin filaments has never been reported. In RPE cells, keratin filaments co-exist  
145 with vimentin filaments. This allows us to use our RPE KO cells for analysis of keratin transport.  
146 Immunostaining of the keratin network using a pan-keratin antibody shows an intricate network  
147 of keratin filaments that extend to the cell edge (Figure 2A). Interestingly, the absence of  
148 kinesin-1 causes the retraction of the keratin network from the cell periphery (Figure 2A-B). This  
149 observation suggests that at least in RPE cells, keratin filaments, like vimentin, can potentially be  
150 transported along microtubules by kinesin-1.

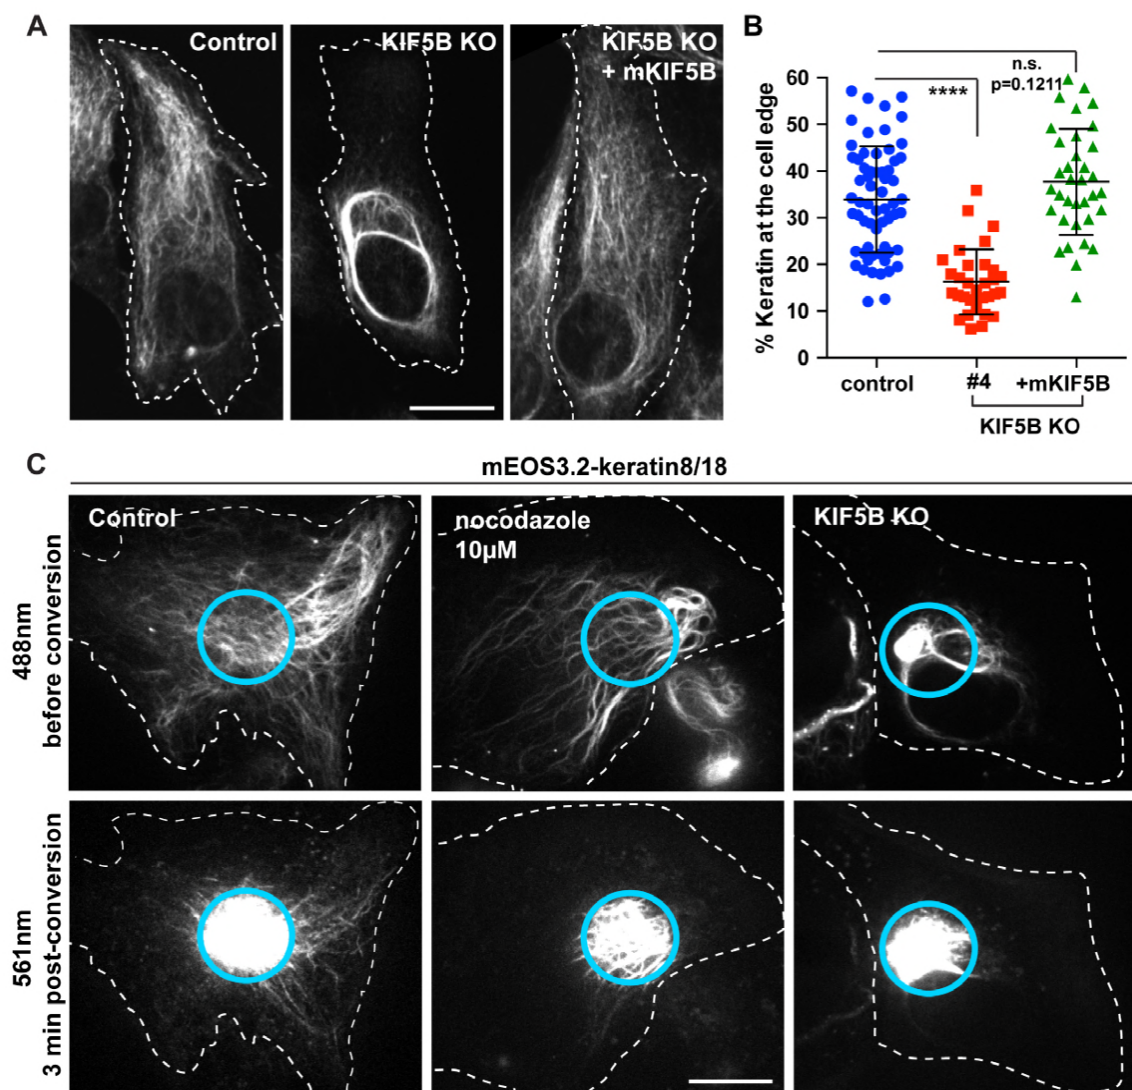

151

152 *Figure 2. KIF5B KO changes keratin filament distribution and inhibits keratin filament*

153 *transport. A) Confocal imaging of keratin immunostaining in control versus KIF5B KO cells.*

154 *The cell periphery was delineated by a dashed line to emphasize the retraction of the keratin*

155 *filaments from the cell edge in KIF5b KO cells. In the last column, mKIF5B-Emerald was*

156 *expressed in KIF5B KO cells to rescue keratin distribution. B) Graph shows the % of keratin at*

157 *the cell edge (Mean with SD; n >30 cells). Data are representative of at least two independent*

158 *experiments. Statistical significance was determined using the Mann-Whitney test (\*\*\*\*;*

159 *p<0.0001). C) Photoconversion of mEos3.2-keratin 8/18 in RPE cells using spinning disk*

160 *confocal microscopy. mEos3.2-keratin was photoconverted from green to red at the cell center*  
161 *(cyan circle). The top panels show keratin network in the green channel (488nm) before*  
162 *conversion and the bottom panels show the red channel (561nm) 3 minutes after*  
163 *photoconversion. Several photoconverted filaments were present outside of the original*  
164 *photoconverted zone in the control cells, while photoconverted filaments remained inside the*  
165 *initial zone after nocodazole treatment (10 $\mu$ M for 3hrs) in KIF5B KO cells. Bar, 10 $\mu$ m.*

166  
167 To visualize keratin filament dynamics, we co-expressed photoconvertible keratin 8 and keratin  
168 18 (mEos3.2-krt8/18) in RPE cells. As described for mEos3.2-vimentin, a subset of keratin  
169 filaments at the cell center was photoconverted and imaged in the red channel for 3 min using  
170 spinning disk confocal microscopy. Remarkably, long as well as short keratin filaments moved  
171 away from the photoconverted zone during 3 min (Figure 2C left panels, Video S3). The  
172 accumulation of keratin filaments outside the photoconverted zone was abolished by nocodazole  
173 treatment, demonstrating the role of microtubules in the transport of keratin filaments (Figure  
174 2C, middle panels, Video S4). When the same experiment was conducted in *KIF5B* KO RPE  
175 cells, no transport of photoconverted keratin filaments outside of the photoconverted zone was  
176 observed (Figure 2C, right panels, Video S5). Therefore, kinesin-1 drives keratin filaments  
177 transport along microtubules.

178

179 **Keratin filaments are transported independently of vimentin.**

180 What distinguishes RPE from typical epithelial cells is that the keratin and vimentin IF networks  
181 look very similar, and often these two types of filaments are located in close proximity to each  
182 other (Figure S3A) raising the possibility that keratin filaments are co-transported with vimentin

183 filaments. To test that hypothesis, we took advantage of CRISPR/Cas9 genome editing to KO  
184 vimentin in RPE cells (Figure S3D) and look at the impact of the absence of vimentin for keratin  
185 distribution. Surprisingly, in RPE cells the keratin filaments network completely collapsed in  
186 absence of vimentin, making it impossible to study keratin filament transport in vimentin null  
187 cells (Figure S3B). This phenotype is not caused by an off-target effect from the genome editing  
188 because it can be rescued by the expression of mouse vimentin insensitive to the gRNA used to  
189 KO human vimentin (Figure S3C-D).

190  
191 Obviously, interdependence of two IF networks could be a unique feature of RPE cells because  
192 vimentin is absent from many keratin-expressing cells and thus is not universally required for  
193 normal keratin distribution. We, therefore, examined human carcinoma A549 cells, which co-  
194 express vimentin and keratin. In these cells, like in typical epithelial cells, the keratin IF network  
195 remained expanded even after vimentin KO (Figure 3A). First, we expressed mEos3.2-krt8/18 in  
196 A549 cells and observed that a subpopulation of keratin filaments was transported in these cells  
197 (Figure 3B, left panel, Video S6) showing that keratin transport along microtubules is not  
198 restricted to RPE cells but can occur in other cell types. Next a photoconversion experiment was  
199 performed in A549 vimentin KO cells. The result revealed that keratin filaments were  
200 transported even in the cells lacking vimentin (Figure 3B, right panel, Video S7), demonstrating  
201 that keratin filaments can be transported independently of vimentin.

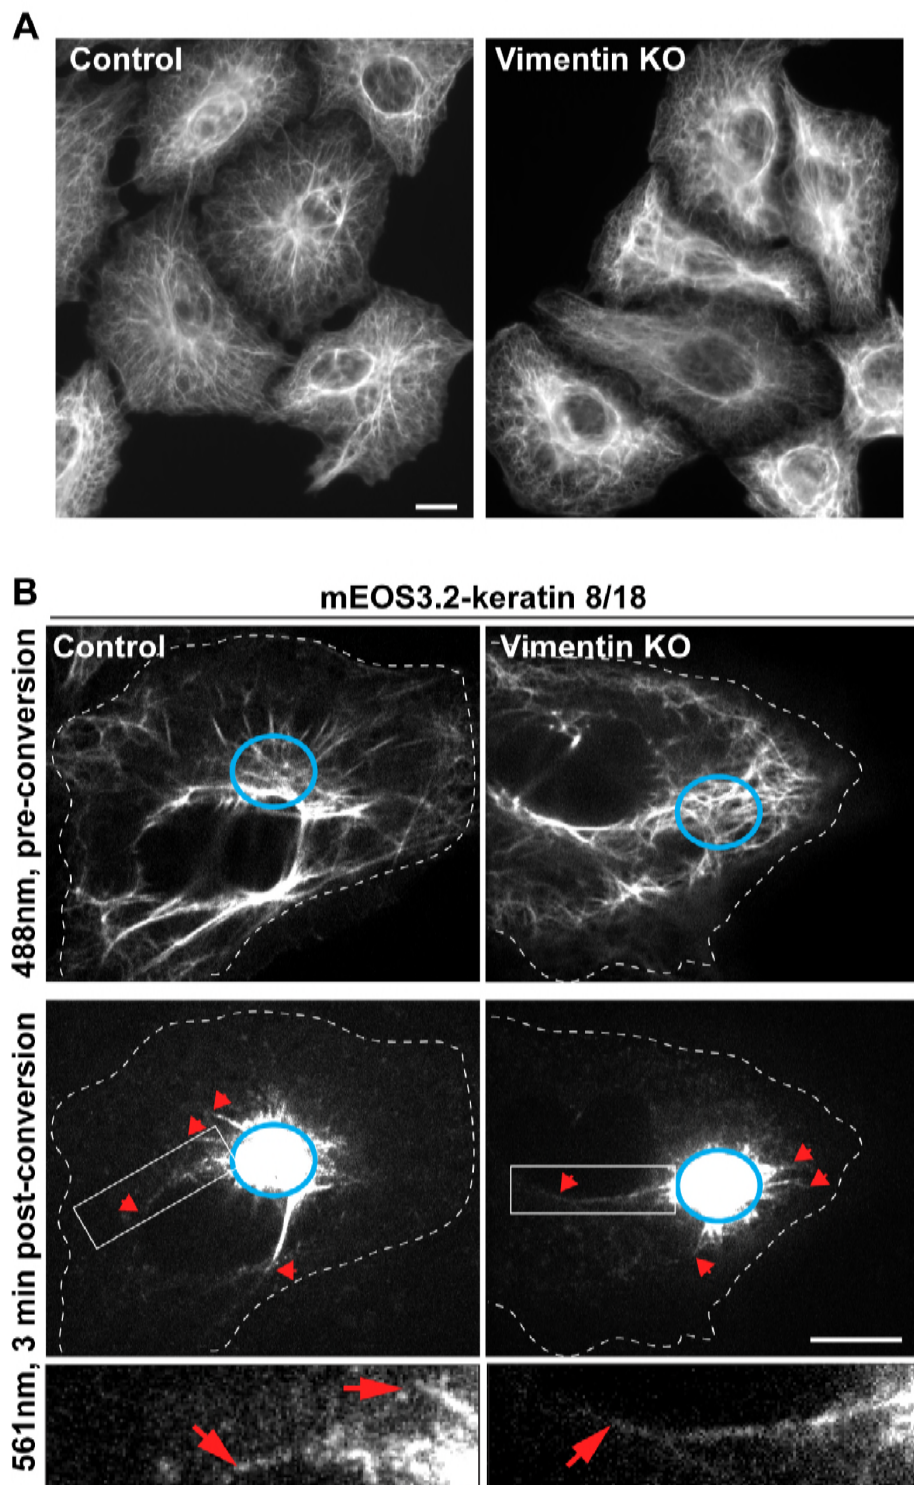

202

203 *Figure 3. Keratin filaments are transported in the absence of vimentin in A549 cells. A)*

204 *Widefield microscopy imaging of keratin immunostaining in A549 cells (WT versus vimentin*

205 *KO). B) Photoconversion experiment of mEos3.2-keratin 8/18 in A549 cells using spinning disk*

206 *confocal microscopy. mEos3.2-keratin was photoconverted from green to red at the cell center*  
207 *(cyan circle). The top panels show keratin network in the green channel (488nm) before*  
208 *conversion and the bottom panels show the red channel (561nm) 3 minutes after*  
209 *photoconversion. Translocated photoconverted filaments are indicated by red arrows. The*  
210 *enlargement show that fully polymerized keratin filaments were transported even in absence of*  
211 *vimentin. Bars, 10 $\mu$ m.*

212

### 213 **Keratin and vimentin filaments are transported using the same mechanism.**

214 Our results have demonstrated that both vimentin and keratin filaments are transported along  
215 microtubules by kinesin-1. Typically, kinesin-1 binds to its cargo via kinesin light chains  
216 (KLC) (26-28). In a small number of cases, some cargoes bind to kinesin-1 tail and do not  
217 require KLC for transport (29, 30). To determine whether IFs utilize KLC as an adapter, we  
218 used genome editing to KO KLC1, the gene encoding the predominant isoform of KLC in RPE  
219 cells (Figure 4A). Immunostaining of vimentin and keratin filaments in RPE cells revealed that  
220 KLC1 KO did not affect the distribution of either type of IF network (Figure 4B, G). However,  
221 the human genome contains four genes encoding for KLC and their pattern of expression in RPE  
222 cells is not well established. Therefore, we decided to use an alternative approach, replacing the  
223 wild-type KIF5B in RPE cells with a truncated version of the motor lacking the region that  
224 recruits KLC to the kinesin-1 complex. To accomplish this, we deleted the heptad repeats  
225 (residues 775-802) of mKif5b responsible for KLC binding, creating (mKif5b $\Delta$ 775-802-Emerald)  
226 (Figure 4C). Pull-down experiments and western blot analyses were performed to confirm that  
227 mKIF5B $\Delta$ 775-802-Emerald did not interact with KLC. As described previously, KLC binding to  
228 kinesin-1 is required for their stability (31). As a consequence, neither KLC1 nor KLC2 were

229 detectable by western blot analysis in crude extract of *KIF5B* KO cells (Figure 4D). We found  
230 that the rescue of *KIF5B* KO by expression of the full-length mKif5b-Emerald prevented  
231 degradation of KLC. In contrast, KLC 1 and 2 remained undetectable in lysates from cells  
232 expressing mKif5b<sup>A775-802</sup>-Emerald (Figure 4D). In addition to probing crude extracts, the kinesin-1  
233 complex was enriched by pull down using GFP-binder and the pellets were probed for the  
234 presence of KLC1 and KLC2. These experiments showed that the full-length mKif5b-Emerald  
235 bound KLC1 and KLC2 while no KLC could be found even after enrichment of mKif5b<sup>A775-802</sup> -  
236 Emerald (Figure 4E).

237 Immunostaining of vimentin and keratin IFs was employed to compare the efficiency of full-  
238 length mKif5b and mKif5b<sup>A775-802</sup> in rescuing IF distribution. The images showed that removal of  
239 KLC and the region of kinesin tail that interacts with KLC had no effect on the capacity of  
240 mKif5b to rescue keratin or vimentin distribution (Figure 4F). This observation was reflected in  
241 the quantification of vimentin and keratin fluorescence intensity at the cell edge, confirming that  
242 both mKif5b and mKif5b<sup>A775-802</sup> constructs rescued IF distribution to the same extent (Figure 4G).

243 These results demonstrate that KLCs are not involved in the kinesin-dependent transport of IFs.

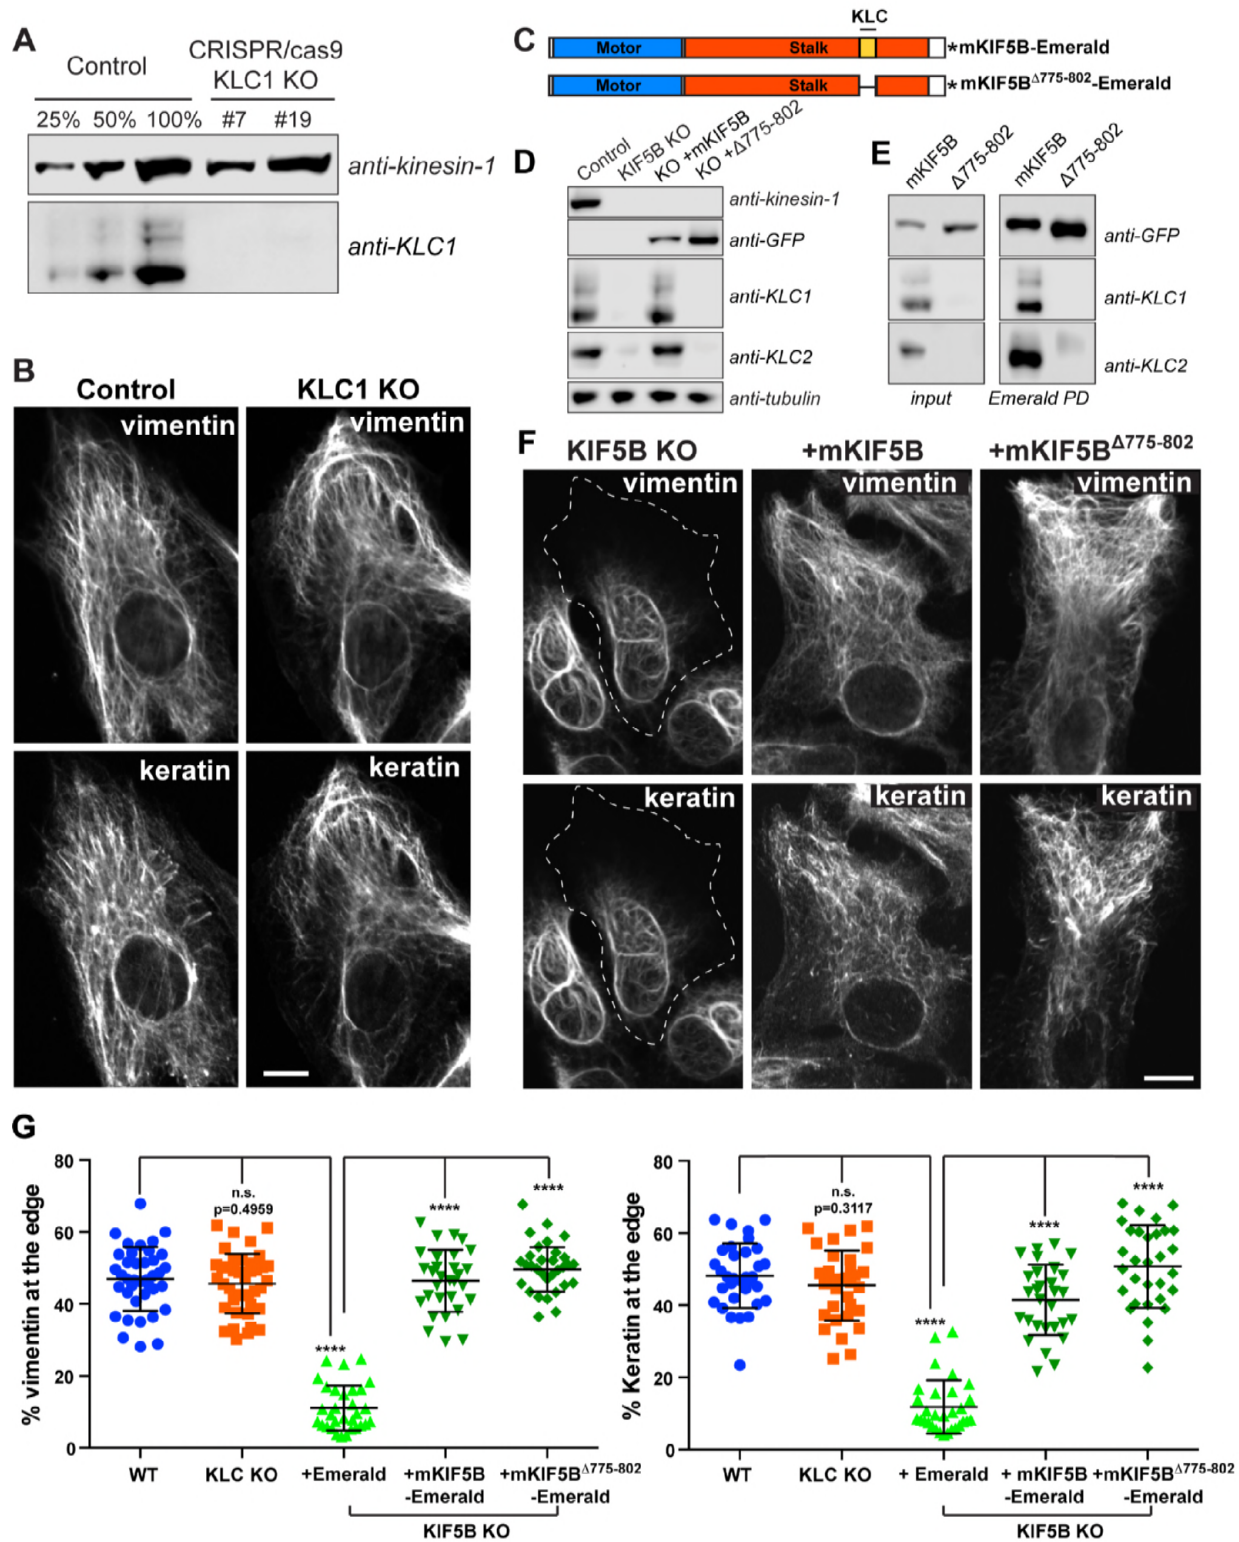

244

245 *Figure 4. Transport of vimentin and keratin filaments is independent of kinesin light chain.*



246 A) Western blot analyses using KLC-1 antibody showed the absence of KLC-1 in two different  
247 KLC-1 CRISPR clones (#7 and #19). KiF5 antibody was used as loading control. B) Confocal  
248 microscopy of vimentin and keratin immunostaining in RPE cells WT (control) and KLC-1 KO.  
249 C) Schematic representation of mKif5b-Emerald and mifF5b<sup>Δ775-802</sup>-Emerald. The domain in blue is  
250 the motor domain of mKif5b, the red part is the stalk which comprise the heptad repeat domain  
251 responsible for KLC binding in yellow. Note that this KLC binding domain is absent from the  
252 mKif5b<sup>Δ775-802</sup>-Emerald. The asterisk represents Emerald. D) Western blot analyses of kinesin-1,  
253 KLC1 and KLC2 showed that KLCs were absent from the lysate prepared from the KIF5B KO  
254 cells. Anti-tubulin was used as loading control. E) Endogenous KIF5B was replaced by mKif5b-  
255 Emerald or mKif5b<sup>Δ775-802</sup>-Emerald. The presence of KLC1 and KLC2 was determined by western  
256 blot of crude cell lysates (left panel) or after enrichment of the kinesin-1 complex by pull down  
257 using GFP-binder recognizing Emerald. F) Confocal microscopy imaging of vimentin and  
258 keratin immunostaining in RPE Kif5b KO cells after the expression of Emerald (KIF5B KO),  
259 mKIF5B-Emerald (+mKIF5B) or mKIF5B<sup>Δ775-802</sup>-Emerald (+Δ775-802). G) Graphs show the % of  
260 vimentin (left) or keratin (right) at the cell edge (Mean with SD; n >30 cells). Data are  
261 representative of at least two independent experiments. Statistical significance was determined  
262 using the Mann-Whitney test (\*\*\*\*; p<0.0001)

263  
264 Since KLC was not required for IF transport, we concluded that a specific cargo-binding region  
265 of the kinesin tail might be involved. To determine which part of the KIF5B tail is important, we  
266 created three other truncated version of mKif5b fused to Emerald: mKif5b<sup>1-773</sup>, mKif5b<sup>1-806</sup> and  
267 mKif5b<sup>1-892</sup> (Figure 5A). All three constructs were properly expressed in KIF5B KO RPE cells and  
268 are likely functionally active as they accumulated at the cell periphery, where most of the

269 microtubule plus-ends are located. This distribution was different from the distribution of full-  
270 length mKIF5B because the C-terminal truncations removed the autoinhibitory domain located at  
271 residues 937-952 of KIF5B (32), producing a constitutively active motor (Figure 5B).

272

273 The ability of these three truncations to rescue vimentin and keratin IF distribution in *KIF5B* KO  
274 cells was tested by immunostaining. Deletion of the last 70 residues of KIF5B, creating mKif5b<sup>Δ</sup>  
275 <sup>892</sup> did not prevent the ability of mKif5b to rescue the IF distribution, while more extensive  
276 truncations (mKif5b<sup>1-773</sup>, mKif5b<sup>1-806</sup>) inhibited the ability of mKif5b to properly position IF. These  
277 results and the rescue by mKIF5B<sup>Δ775-802</sup>, strongly support the presence of an IF binding between  
278 residues 803-892 of the KIF5B tail (Figure 5A). It is worth noting, that the constructs that  
279 rescued vimentin distribution were also able to rescue the distribution of keratin and vice versa.

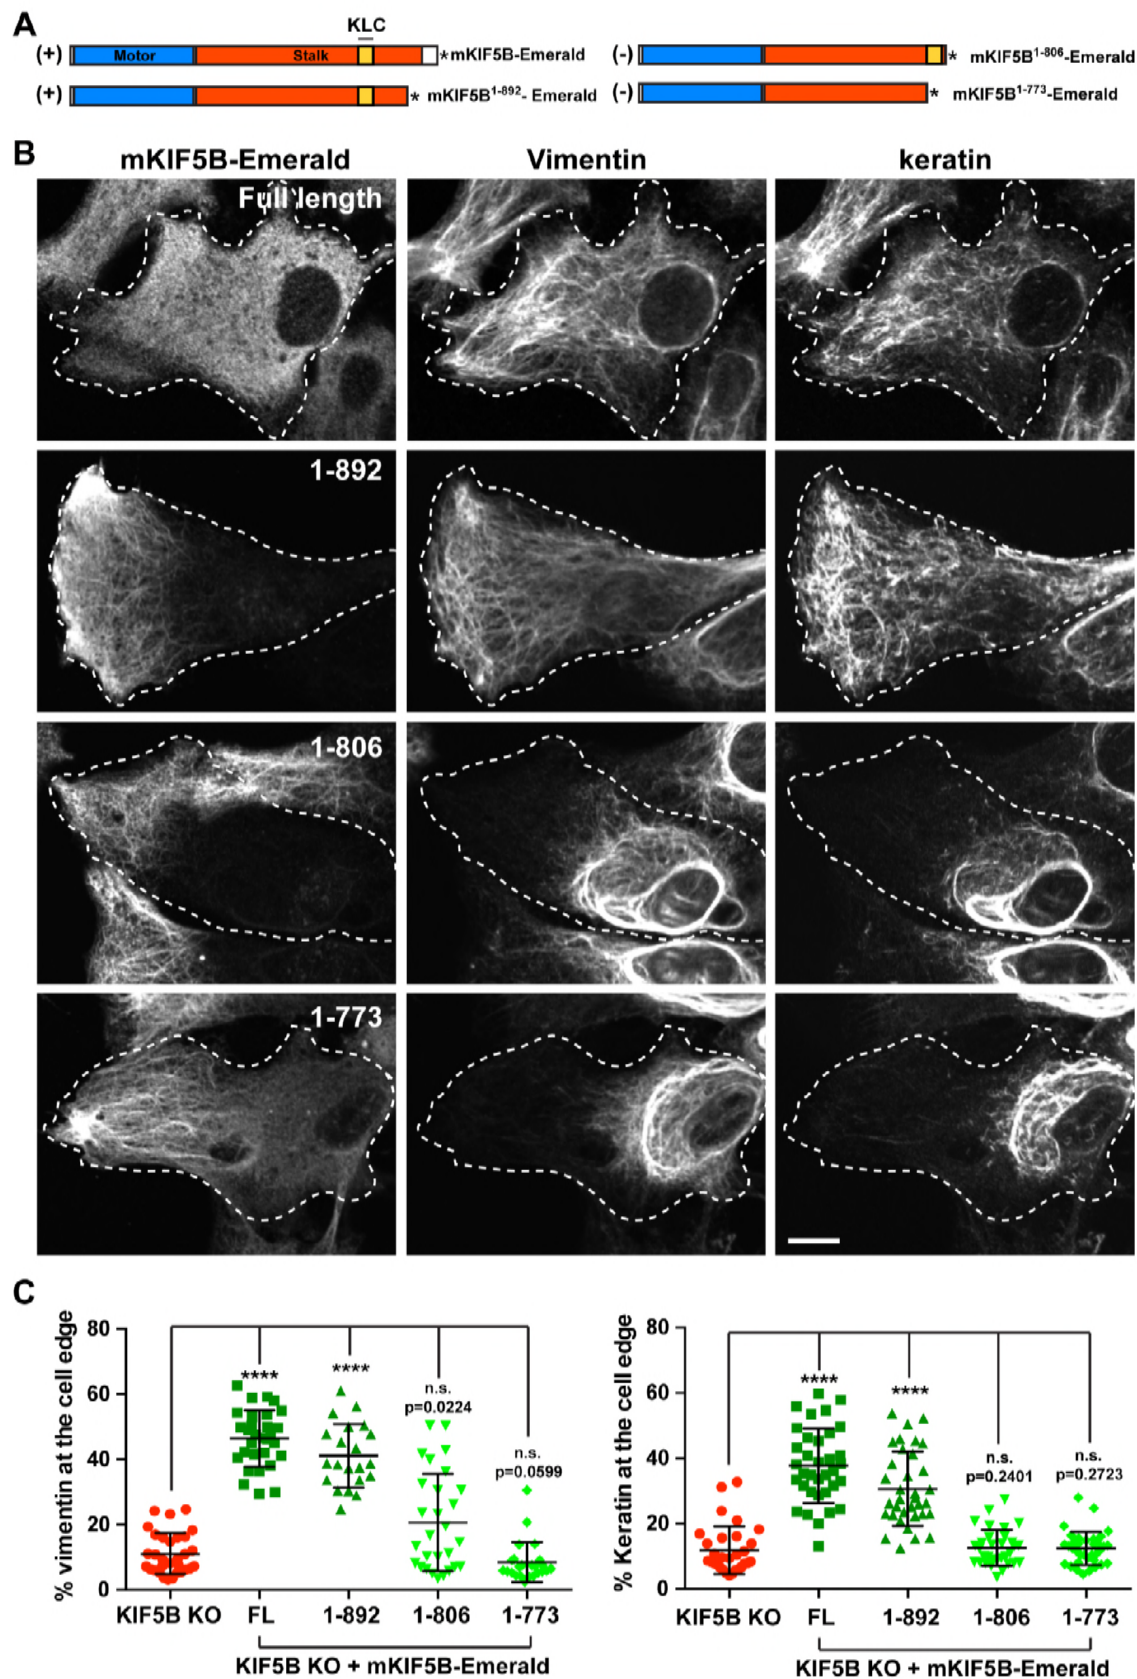

281 *Figure 5. Mouse Kif5b<sup>1-982</sup> rescues IF distribution in KIF5B KO cells. A) Schematic representation*  
282 *of different truncations of the KIF5B tail. The mKIF5 constructs capable of rescuing vimentin*  
283 *and keratin distribution are marked by a (+). The asterisk represents Emerald. B) Confocal*  
284 *microscopy imaging of vimentin and keratin immunostaining in RPE KIF5B KO cells after the*  
285 *expression of mKif5b-Emerald (full length), mKif5b<sup>1-892</sup>-Emerald (1-892), mKif5b<sup>1-806</sup>-Emerald (1-*  
286 *806) or mKif5b<sup>1-773</sup>-Emerald (1-773). C) Graphs show the % of vimentin (left) or keratin (right) at*  
287 *the cell edge (Mean with SD, n >30 cells). Data are representative of at least two independent*  
288 *experiments. Statistical significance was determined using the Mann-Whitney test.*

289

## 290 **DISCUSSION**

291 The development of fluorescent probes and advances in live cell imaging, have dramatically  
292 changed our understanding of IF dynamics. Traditionally considered as mostly static rigid  
293 structures, IFs are, in fact, highly dynamic, undergoing constant rearrangement by severing and  
294 re-annealing (7, 8), subunit exchange (33) as well as translocation of precursors and fully  
295 polymerized filaments (8, 12, 34, 35). In this paper, we established that kinesin-1 is essential to  
296 vimentin IFs transport along microtubules. In *KIF5B* KO cells, vimentin filaments are depleted  
297 from the cell edge (Figure 1A) and active transport of vimentin filaments from the cell center to  
298 the cell periphery is no longer observed (Figure 1C). Furthermore, we showed that even fully  
299 polymerized keratin IFs undergo constant transport along microtubules powered by kinesin-1  
300 (Figure 2-3). Finally, we established, that KLC was not involved in vimentin or keratin IF  
301 transport by kinesin (Figure 4) and that the same region of the kinesin tail is required for both  
302 keratin and vimentin transport (Figure 5).

303

304 **Contribution of microtubules to keratin network dynamics**

305 The dynamics of the keratin filament network has been extensively studied (25). It has been  
306 clearly demonstrated that actin dynamics are responsible for the retrograde transport of keratin  
307 filament precursors formed at the focal adhesion and long filaments to the perinuclear region (18,  
308 20, 22, 36). Experiments using fluorescence recovery after photobleaching (FRAP) have been  
309 very powerful to decipher the role of subunit exchange during the cycle of assembly and  
310 disassembly of the entire keratin network (19, 37). This model was recently recapitulated *in vivo*  
311 in an elegant study using YFP-tagged keratin in murine embryos (38).

312  
313 In our study, we used photoconversion as an alternative approach to follow a small subset of  
314 individual filaments at the cell center, the site where the filament network is especially dense. By  
315 using this technique, we were able to observe for the first time the anterograde transport of fully  
316 polymerized keratin filaments.

317  
318 Our data complement very well the published keratin dynamics, demonstrating the contribution  
319 of microtubule-dependent transport from the cell center to the periphery. We believe that the  
320 contribution of microtubule-dependent transport to keratin IF dynamics is dependent on the  
321 physiological context. We looked at keratin dynamics in two different cell lines; RPE cells, that  
322 are highly motile, and A549 carcinomas cells, which are stationary and tend to form cell-cell  
323 contacts like typical epithelial cells. We observed keratin filament transport in both cell types,  
324 but it was more most robust in RPE cells, raising the possibility that microtubule-dependent  
325 transport of keratin filaments could be upregulated as the cells change shape. We speculate that

326 anterograde transport of keratin filaments in epithelial cells delivers filaments to newly formed  
327 areas of cytoplasm in migrating epithelial cells.

328

### 329 **Kinesin-1 as a universal transporter of intermediate filaments**

330 In this paper, we established using *KIF5B* KO that kinesin-1 is the anterograde motor responsible  
331 for the transport of vimentin and keratin IFs. A role for kinesin-1 has been suggested previously  
332 using less specific or less efficient approaches, such as antibody injection that inhibits multiple  
333 kinesins (9), or shRNA that causes incomplete knock down (13). In both cases, we could not  
334 exclude the possibility that kinesin-1 was cooperating with other anterograde motors to transport  
335 vimentin. Antibody injection caused a dramatic retraction of vimentin filaments that could be  
336 explained by the inhibition of multiple kinesins, and the incomplete retraction of vimentin  
337 filaments observed after *KIF5B* knock down could have been explained by the action of a second  
338 kinesin motor capable of moving vimentin filaments, or incomplete kinesin-1 depletion. In our  
339 current study, the KO of *KIF5B* completely removed kinesin-1 from RPE cells, resulting in the  
340 complete inhibition of not only vimentin, but also keratin transport along microtubules and the  
341 retraction of the two IF networks to the perinuclear region. This retraction is very likely caused  
342 by actin retrograde flow as demonstrated previously during nocodazole treatment (39), or by  
343 retrograde transport along microtubules (8, 40) and is normally counteracted by kinesin-driven  
344 anterograde transport.

345

346 Kinesin-1 KO has been demonstrated to have a major impact in at least two different tissues by  
347 affecting different types of IFs. Conditional KO of the neuronal isoform of kinesin-1, *Kif5a* in  
348 mouse neurons inhibits neurofilament transport into the axon leading to the accumulation of the

349 three neurofilaments (NFs) NF-H, NF-M and NF-L in the cell body causing neurodegeneration  
350 and premature death of the animal (15, 41). More recently, conditional KO of *Kif5b* in mouse  
351 myogenic cells prevents the recruitment of desmin and nestin IFs to the growing tip of the  
352 myotube during muscle formation associated with severe skeletal muscle abnormalities and heart  
353 failure (16). Based on our study and others, we can conclude that all types of IFs, except perhaps  
354 the nuclear lamins, are kinesin-1 cargoes.

355

### 356 **Are all IFs transported along microtubules using the same mechanism?**

357 Using mKIF5B truncations to rescue vimentin and keratin IFs distribution in *KIF5B* KO cells,  
358 we determined that KLC was not involved in the transport of these two types of IFs and that a  
359 region between residues 803-892 of the kinesin tail was required (Figure 4-5). These findings  
360 corroborate a previous IF study showing that proper localization of desmin- and nestin-  
361 containing IFs in the myofibril is independent of KLC and can be rescued with a truncated  
362 version of KIF5B lacking the last 73 residues of the kinesin tail (1-890)(16). This suggests that  
363 several types of IF probably bind to the same region of the kinesin tail, reinforcing the  
364 hypothesis that all IFs are transported along microtubules by a common mechanism. However, it  
365 is unknown whether IFs bind to kinesin-1 directly, or if this binding is mediated by an adaptor  
366 protein. Direct interaction between the IF protein desmin and the kinesin tail has been  
367 demonstrated *in vitro* (16), suggesting that it could be the case for other types of IF. If an adaptor  
368 is involved, it likely links all types of IF to the region 803-892 of the kinesin tail. Whether IF  
369 binding to kinesin-1 is direct or adaptor-mediated, the region of the IF proteins responsible for  
370 the interaction with kinesin-1 needs to be identified. Since all IF types are potential kinesin-1

371 cargoes, it is plausible that the recognition domain for kinesin-1 is located in the central  $\alpha$ -helical  
372 rod domain that is highly conserved in IF proteins (42).

373

374 There is compelling evidence that IFs functions go well beyond the control of mechanical  
375 integrity, as they are becoming key players in the signal transduction of stress-related and other  
376 cellular responses (43). In that context, the proper delivery of IFs to sub-cellular locations might  
377 be a key requirement for their ever-growing list of functions.

378

## 379 **MATERIALS AND METHODS**

### 380 **DNA constructs**

381 mEos3.2-vimentin in pQCXIN was described before (8). To create mEos3.2-keratin 8 and  
382 mEos3.2-keratin 18, Eos3.2 was amplified from mEos3.2-vimentin by PCR with Phusion  
383 polymerase (Clontech) and joined to pQCXIN cut with NotI by InFusion (Takara). The resulting  
384 vector was cut with BamHI. The keratins were amplified from pcDNA-keratin 8 or 18 by PCR  
385 with Phusion polymerase and joined to the BamHI cut pQCXIN with InFusion.

386

387 Mouse KIF5B (mKIF5B) cDNA was provided by Addgene (pKIN1B plasmid #31604). To  
388 create mKIF5B deletion, mKIF5B was amplified by PCR using the forward primer  
389 ATAAGAATGCGGCCGCTTCCAGAAAGATGGC together with one of the following reverse  
390 primers. For mKIF5B full length, ATGGATCCCACGACTGCTTGC  
391 CTCCACCAC; mKIF5B<sup>1-773</sup>, ATGGATCCCAGTCTTGCATAACCGTGAGCT; mKIF5B<sup>1-806</sup>,  
392 ATGGATCCCAGTCCTGAACAAAGAGCTTAC; mKIF5B<sup>1-892</sup>, ATGGATCCCAACGGTCT  
393 CGAGATGCATTTT. For mKIF5B<sup>Δ775-802</sup>, the complementary oligos CACGGTTATG



394 CAAGACAGATTTGTTTCAGGACTTGCCTACCAGGGTGAAAAAGAGCGCCGAGG and  
395 TCGACCTCGGCGCTCTTTTTACCCTGGTAGCCAAGTCCTGAACAAATCTGTCTTGCA  
396 TAACCGTGAGCT were phosphorylated, annealed and inserted into the SacI/SalI restricted  
397 sites of the mKIF5B cDNA. The deletion mutant was amplified by PCR using the same primers  
398 as mKIF5B full length. All the Emerald tagged mKIF5B constructs were generated by replacing  
399 vimentin from vimentin-Emerald pQCXIN (8) by the mKIF5 constructs using the AgeI/BamHI  
400 sites.

401  
402 To generate untagged mouse vimentin (mVimentin) in pQCXIP, mVimentin was amplified using  
403 the primers CGCACCGGTATGTCCACCAGGTCCGTG and  
404 CGGAATTCCTTATTCAAGGTCATCG. The PCR fragment was digested and inserted into the  
405 AgeI/EcoRI sites of the pQCXIP vector. The generation of the Y117L-vimentin mutant cDNA  
406 has been described (44).

407  
408 **Antibodies and reagent**

409 Chicken polyclonal anti-vimentin (PCK-594P) is from BioLegend (Dedham, MA); mouse pan-  
410 cytokeratin (C2931) is from Sigma (St. Louis, MO); rabbit polyclonal KLC1 (19028-1-AP) and  
411 KLC2 (17668-1-AP) antibodies are from Proteintech (Rosemont, IL). CT and HD polyclonal  
412 antibodies against kinesin are a kind gift from Fatima Gyoeva (Institute of Protein Research,  
413 Russian Academy of Sciences, Moscow, Russia). Rhodamine-conjugated phalloidin,  
414 MitoTracker Deep Red and LysoTracker Deep red dyes are from Invitrogen Molecular Probes  
415 (Eugene, OR)

416

## 417 **Cell lines and CRISPR/Cas9 knock out**

418 All cells were maintained at 37°C in 5% CO<sub>2</sub>. RPE cells were maintained in DMEM  
419 supplemented with 1 mM sodium pyruvate (Gibco) and 10% fetal bovine serum (FBS,  
420 Neuromics); Human lung carcinoma A549 WT and Vimentin KO cells were generously  
421 provided by Dr. Karen Ridge (Northwestern University, Chicago, IL). A549 cells were  
422 maintained in DMEM (Corning Cellgro, Mediatech Inc.) supplemented with 10% FBS and  
423 10mM HEPES (Gibco).

424  
425 All vectors for CRISPR/cas9 genome editing are from GenScript (Piscataway, NJ). The Kif5b  
426 KO and klc1 KO cell lines were created by the transduction of RPE or A549 cells with lentivirus  
427 carrying LentiCRISPR V2 KIF5B gRNA1 (target sequence CTATACCTTGTGCTCGAAGC) or  
428 LentiCRISPR V2 KLC1 gRNA1 (target sequence GAAGCAGAACTGCGTGCGC). Lentivirus  
429 were produced in HEK 293 FT cells transfected with the LentiCRISPR V2 vector containing  
430 cas9 and KIF5B or KLC1 gRNA together with the helper plasmids pVSVG (Clontech) and  
431 pPAX2 (Imgenex) encoding the gag/pol and env proteins required for virus production. Virus-  
432 containing medium was collected and filtered 48 hours after the transfection of the packaging  
433 cells. 8μg/mL of polybrene (Sigma) was added to the freshly collected viruses and RPE or A549  
434 cells were incubated for 6 hours with this virus/medium/polybrene mixture. Two days later,  
435 infected cells were selected using 5μg/mL puromycin for 1 week and survivor cells were plated  
436 at 1 cell/well.

437  
438 To KO vimentin in RPE, cells were transfected with pGS-vimentin gRNA1-Neo (target sequence  
439 ATTGCTGACGTACGTCACGC) using Lipofectamine 3000 according to the manufacturer's

440 instructions. 48h after transfection, transfected cells were selected using 1mg/mL G418 for two  
441 weeks and survivor cells were plated at 1cell/well. For all CRISPR cell lines, single colonies  
442 were amplified, lysed and tested for knock out by western blot.  
443  
444 mEos3.2-vimentin and mEos3.2-keratin 8/18 were stably expressed in RPE (WT and *KIF5B* KO)  
445 or in A549 by retroviral transduction. Retroviruses were produced as described above except that  
446 the helper plasmids pVSVG (Clontech) and pCL-Eco (Imgenex, San Diego, CA) were used  
447 instead. Transduced cells were selected using 2mg/ml G418 for 1 week.  
448 Retrovirus transduction of RPE *KIF5b* KO was performed to replace WT *KIF5b* by the different  
449 mouse *KIF5b* constructs listed above. mVimentin and mVimentin<sup>Y17L</sup> were also expressed in RPE  
450 vimentin KO cells by retrovirus transduction.

451

#### 452 **Enrichment of the kinesin-1 complex by pull down using GFP-binder.**

453 *KIF5B* KO cells expressing mKif5b-Emerald or mKif5b<sup>A775-S802</sup>-Emerald from two sub-confluent  
454 100mm dishes lysed in 1mL of ice-cold RIPA buffer (50mM Tris pH 7.4, 150mM NaCl, 1%  
455 Triton, 0.5% Na Deoxycholate, 0.1% SDS, 10mM NaPPi, 1.5mM NaVO<sub>3</sub>, 1mM PMSF)  
456 supplemented with peptidase inhibitors (CLP, chymostatin, Leupeptin and Pepstatin A  
457 20μg/mL). The cell lysates were centrifuge at 20,000g for 5 min. The soluble fraction was  
458 incubated for 4 hrs at 4°C with 30μL sepharose beads conjugated with single chain GFP  
459 antibody (GFP-binder, GFP-Trap-M from Chromotek). Beads were washed 3 times with RIPA-  
460 base (50mM Tris pH 7.4, 150mM NaCl, 1% Triton X-100, 10mM NaPPi, 1.5mM NaVO<sub>3</sub>, 1mM  
461 PMSF) supplemented with CLP. The kinesin-1 complex was pulled down via binding of  
462 Emerald from mKIF5B-Emerald to the GFP binder beads by centrifugation at 3000xg and  
463 resuspended in 30μL of Laemmli buffer (5% SDS, 0.1mM Tris pH 6.8, 140mM β-

464 mercaptoethanol, 0.25% glycerol). Samples were boiled for 5 minutes and analysed by western  
465 blot.

466

#### 467 **Immunostaining for widefield and confocal microscopy**

468 Cells were plated on glass coverslips to desired confluence ~16hr before fixation. For vimentin  
469 and actin co-staining plus keratin and actin co-staining, cells were fixed with 3.7% formaldehyde  
470 in CSK buffer (100mM NaCl, 300mM Sucrose, 3mM MgCl<sub>2</sub>, 10mM Pipes pH 6.8)  
471 supplemented with 0.1% Triton X-100 for 10 min. For vimentin and keratin co-staining, cells  
472 were fixed with ice-cold MeOH for 5 min at -20°C. Fixed cells were then further extracted in  
473 0.2% Triton X-100 in PBS before staining. Immunostaining was performed in wash buffer (TBS  
474 supplemented with 1% BSA, 0.1% Triton-X100) as described previously (12).

475

476 Images of fixed cells were captured on a Nikon Eclipse U2000 inverted microscope (Nikon  
477 Instruments, Melville, NY, USA) equipped with Ph3 40x/1.0 NA objective and a CoolSnap ES  
478 CCD camera (Roper Scientific, Planegg/Martinsried, Germany), driven by Nikon Elements  
479 software. Fluorescence excitation was achieved using a mercury lamp. Images of vimentin and  
480 keratin co-staining were collected from a Zeiss confocal LSM510 META (Carl Zeiss, Jena,  
481 Germany) microscope with oil immersion objective lenses (Plan-Apochromat, 60×, 1.40  
482 numerical aperture NA; Carl Zeiss).

483

#### 484 **Vimentin and keratin distribution measurement**

485 Widefield microscopy images of vimentin or keratin and actin co-staining captured as described  
486 above were analysed using the FIJI software version 2.0. For at least 30 cells per condition, a

487 single line, three pixels in width, was traced manually from the center of the nucleus to the cell  
488 edge as delineated by the F-actin staining (See Figure S1). The intensity values along this line  
489 were obtained using the “plot profile” plugin from FIJI. The mean fluorescence intensity and the  
490 positions along the line for each cell were normalized from 0 to 1 using Matlab. The normalized  
491 data were transferred to Prism 7 software (GraphPad Prism, GraphPad Software, San Diego CA)  
492 for further analyses. The percentage of signal at the edge was calculated by dividing the area  
493 under the curve (AUC) between positions 0.5 to 1 by the total AUC between positions 0 to  
494 1. Data are representative of two or more independent experiments and are shown as the mean  
495 with SD ( $n>30$ ). Statistical significance was determined using the non-parametric Mann-Whitney  
496 test with a confidence interval of 95%. This test analysis compares the distributions of two  
497 unpaired groups.

498

#### 499 **Keratin network spreading measurement**

500 Keratin network spreading analyses were performed on confocal images of vimentin and keratin  
501 co-staining, acquired with 100x objective lens as described above using the FIJI software version  
502 2.0. The vimentin signal was used to manually trace the area of single cell using the polygon  
503 selection tool of FIJI. High contrasted image of the non-specific staining was used to determine  
504 to outline of the vimentin KO cells. The corresponding channel for the keratin signal was auto-  
505 threshold using the Li method to determine the area (in pixel) covered by keratin signal. The  
506 percentage of keratin spreading was determined by dividing the keratin area by the total area of  
507 the cell. Data are representative of at least two independent experiments and are shown as the  
508 mean with SD ( $n>30$ ). Statistical significance was determined using the non-parametric Mann-

509 Whitney test with a confidence interval of 95%. This test analysis compares the distributions of  
510 two unpaired groups.

511

### 512 **Live cell imaging and photoconversion**

513 For all live-cell experiments, cells were plated on glass coverslips ~16hr before imaging. Cells  
514 were maintained at 37°C in 5% CO<sub>2</sub> during imaging using a Tokai-Hit stage-top incubator  
515 (Tokai-Hit, Fujinomiya City, Japan) and Okolab gas mixer (Okolab, Naples, Italy).

516

517 Confocal images were collected on a Nikon Eclipse U2000 inverted microscope equipped with a  
518 Yokogawa CSU10 spinning-disk confocal head (Yokogawa Electric Corporation, Sugar Land,  
519 TX), a Plan Apo 100×/1.45 NA objective, an Agilent MLC 400 laser set (including 488nm and  
520 561nm lasers; Agilent Technologies, Wood Dale, IL), 89 North Heliophor pumped phosphor  
521 light engine at 405nm (Chroma Technology, Bellows Falls, VT) to drive photoconversion, and  
522 an Evolve EMCCD (Photometrics, Tucson, AZ) driven by Nikon Elements software.

523 Photoconversion mEos3.2-keratin 8/18 from green to red was performed using illumination from  
524 a Heliophor LED light source in the epifluorescence pathway filtered with a 400-nm filter and  
525 confined by a diaphragm. Photoconversion time was 5 s and the zone was 10 μm in diameter,  
526 which was positioned at the cell center. Time-lapse sequences were acquired at 15s intervals for  
527 3 min using 561nm laser. Images were analyzed in Fiji, and assembled in Illustrator.

528

529 Imaging of mEos3.2-vimentin was performed using TIRF on a Nikon Eclipse U2000 inverted  
530 microscope equipped with a Plan-Apo TIRF 100x 1.49 NA objective and a Hamamatsu CMOS  
531 Orca Flash 4.0 camera (Hamamatsu Photonics K.K. Hamamatsu City, Japan), controlled by NIS-

532 Elements AR 4.51.01 software (Nikon, Melville, NY, USA). The angle of a 561 nm laser was  
533 manually adjusted until near total internal reflection was reached as judged by imaging of  
534 photoconverted mEos3.2-vimentin expressing cells. For photoconversion, cells were exposed for  
535 3 sec to UV light from a mercury arc in the epifluorescent light path filtered though a 400nm  
536 excitation filtered and spatially restricted by a pinhole in the field diaphragm position. Time-  
537 lapse sequences were acquired at 15 sec intervals for 3 min using the 561nm laser.

538

539 For each photoconversion experiments, at least ten cells were photoconverted and each condition  
540 was repeated in at least three independent experiments. The representative photoconversion data  
541 are shown for each condition.

542

#### 543 **ACKNOWLEDGEMENT**

544 Research reported in this publication was supported by the National Institute of General Medical  
545 Science of the National Institutes of Health under awards P01GM09697 and R01 GM52111. The  
546 authors would like to thank Dr. Karen Ridge (Northwestern University, Chicago, IL) for the  
547 A549 WT and vimentin KO cells, Fatima Gyoeva (Institute of Protein Research, Russian  
548 Academy of Sciences, Moscow, Russia) for the CT and HD polyclonal antibodies against kinesin  
549 and David Kirchenbuechler from the Center for Advanced Microscopy/Nikon Imaging Center  
550 (Northwestern University, Chicago, IL) for help with quantification of IF distribution.

551

552

553 **REFERENCES**

- 554 1. Mendez MG, Kojima S, & Goldman RD (2010) Vimentin induces changes in cell shape,  
555 motility, and adhesion during the epithelial to mesenchymal transition. *FASEB journal :  
556 official publication of the Federation of American Societies for Experimental Biology*  
557 24(6):1838-1851.
- 558 2. Rogel MR, *et al.* (2011) Vimentin is sufficient and required for wound repair and  
559 remodeling in alveolar epithelial cells. *FASEB journal : official publication of the  
560 Federation of American Societies for Experimental Biology* 25(11):3873-3883.
- 561 3. Helfand BT, *et al.* (2011) Vimentin organization modulates the formation of  
562 lamellipodia. *Molecular biology of the cell* 22(8):1274-1289.
- 563 4. Costigliola N, *et al.* (2017) Vimentin fibers orient traction stress. *Proc Natl Acad Sci U S  
564 A* 114(20):5195-5200.
- 565 5. Jones JC, *et al.* (2017) Intermediate Filaments and the Plasma Membrane. *Cold Spring  
566 Harb Perspect Biol* 9(1).
- 567 6. Robert A, Hookway C, & Gelfand VI (2016) Intermediate filament dynamics: What we  
568 can see now and why it matters. *Bioessays* 38(3):232-243.
- 569 7. Uchida A, Colakoğlu G, Wang L, Monsma PC, & Brown A (2013) Severing and end-to-  
570 end annealing of neurofilaments in neurons. *Proc Natl Acad Sci USA* 110(29):E2696-  
571 2705.
- 572 8. Hookway C, *et al.* (2015) Microtubule-dependent transport and dynamics of vimentin  
573 intermediate filaments. *Molecular biology of the cell* 26(9):1675-1686.
- 574 9. Gyoeva FK & Gelfand VI (1991) Coalignment of vimentin intermediate filaments with  
575 microtubules depends on kinesin. *Nature* 353(6343):445-448.
- 576 10. Wang L, Ho CL, Sun D, Liem RK, & Brown A (2000) Rapid movement of axonal  
577 neurofilaments interrupted by prolonged pauses. *Nat Cell Biol* 2(3):137-141.
- 578 11. Prahlad V, Yoon M, Moir RD, Vale RD, & Goldman RD (1998) Rapid movements of  
579 vimentin on microtubule tracks: kinesin-dependent assembly of intermediate filament  
580 networks. *The Journal of cell biology* 143(1):159-170.
- 581 12. Robert A, Herrmann H, Davidson MW, & Gelfand VI (2014) Microtubule-dependent  
582 transport of vimentin filament precursors is regulated by actin and by the concerted  
583 action of Rho- and p21-activated kinases. *FASEB journal : official publication of the  
584 Federation of American Societies for Experimental Biology* 28(7):2879-2890.
- 585 13. Leduc C & Etienne-Manneville S (2017) Regulation of microtubule-associated motors  
586 drives intermediate filament network polarization. *The Journal of cell biology*  
587 216(6):1689-1703.
- 588 14. Theiss C, Napirei M, & Meller K (2005) Impairment of anterograde and retrograde  
589 neurofilament transport after anti-kinesin and anti-dynein antibody microinjection in  
590 chicken dorsal root ganglia. *European journal of cell biology* 84(1):29-43.
- 591 15. Uchida A, Alami NH, & Brown A (2009) Tight functional coupling of kinesin-1A and  
592 dynein motors in the bidirectional transport of neurofilaments. *Molecular biology of the  
593 cell* 20(23):4997-5006.
- 594 16. Wang Z, *et al.* (2013) Kif5b controls the localization of myofibril components for their  
595 assembly and linkage to the myotendinous junctions. *Development* 140(3):617-626.



- 596 17. Windoffer R, Wöll S, Strnad P, & Leube RE (2004) Identification of novel principles of  
597 keratin filament network turnover in living cells. in *Molecular biology of the cell*  
598 (American Society for Cell Biology), pp 2436-2448.
- 599 18. Kolsch A, Windoffer R, & Leube RE (2009) Actin-dependent dynamics of keratin  
600 filament precursors. *Cell motility and the cytoskeleton* 66(11):976-985.
- 601 19. Kölsch A, Windoffer R, Würflinger T, Aach T, & Leube RE (2010) The keratin-filament  
602 cycle of assembly and disassembly. *Journal of cell science* 123(Pt 13):2266-2272.
- 603 20. Windoffer R, Kölsch A, Wöll S, & Leube RE (2006) Focal adhesions are hotspots for  
604 keratin filament precursor formation. *The Journal of cell biology* 173(3):341-348.
- 605 21. Liovic M, Mogensen MM, Prescott AR, & Lane EB (2003) Observation of keratin  
606 particles showing fast bidirectional movement colocalized with microtubules. *Journal of*  
607 *cell science* 116(Pt 8):1417-1427.
- 608 22. Wöll S, Windoffer R, & Leube RE (2005) Dissection of keratin dynamics: different  
609 contributions of the actin and microtubule systems. *European journal of cell biology*  
610 84(2-3):311-328.
- 611 23. Tanaka Y, *et al.* (1998) Targeted disruption of mouse conventional kinesin heavy chain,  
612 kif5B, results in abnormal perinuclear clustering of mitochondria. *Cell* 93(7):1147-1158.
- 613 24. Pu J, Guardia CM, Keren-Kaplan T, & Bonifacino JS (2016) Mechanisms and functions  
614 of lysosome positioning. *Journal of cell science* 129(23):4329-4339.
- 615 25. Leube RE, Moch M, Kolsch A, & Windoffer R (2011) "Panta rhei": Perpetual cycling of  
616 the keratin cytoskeleton. *Bioarchitecture* 1(1):39-44.
- 617 26. Hirokawa N, *et al.* (1989) Submolecular domains of bovine brain kinesin identified by  
618 electron microscopy and monoclonal antibody decoration. *Cell* 56(5):867-878.
- 619 27. Diefenbach RJ, Mackay JP, Armati PJ, & Cunningham AL (1998) The C-terminal region  
620 of the stalk domain of ubiquitous human kinesin heavy chain contains the binding site for  
621 kinesin light chain. *Biochemistry* 37(47):16663-16670.
- 622 28. Gyoeva FK, Sarkisov DV, Khodjakov AL, & Minin AA (2004) The tetrameric molecule  
623 of conventional kinesin contains identical light chains. *Biochemistry* 43(42):13525-  
624 13531.
- 625 29. Skoufias DA, Cole DG, Wedaman KP, & Scholey JM (1994) The carboxyl-terminal  
626 domain of kinesin heavy chain is important for membrane binding. *The Journal of*  
627 *biological chemistry* 269(2):1477-1485.
- 628 30. Seiler S, *et al.* (2000) Cargo binding and regulatory sites in the tail of fungal conventional  
629 kinesin. *Nat Cell Biol* 2(6):333-338.
- 630 31. Jolly AL, *et al.* (2010) Kinesin-1 heavy chain mediates microtubule sliding to drive  
631 changes in cell shape. *Proc Natl Acad Sci U S A* 107(27):12151-12156.
- 632 32. Hackney DD, Baek N, & Snyder AC (2009) Half-site inhibition of dimeric kinesin head  
633 domains by monomeric tail domains. *Biochemistry* 48(15):3448-3456.
- 634 33. Robert A, Rossow MJ, Hookway C, Adam SA, & Gelfand VI (2015) Vimentin filament  
635 precursors exchange subunits in an ATP-dependent manner. *Proc Natl Acad Sci USA*  
636 112(27):E3505-E3514.
- 637 34. Wang L & Brown A (2001) Rapid intermittent movement of axonal neurofilaments  
638 observed by fluorescence photobleaching. *Molecular biology of the cell* 12(10):3257-  
639 3267.

- 640 35. Yoon M, Moir RD, Prahlad V, & Goldman RD (1998) Motile properties of vimentin  
641 intermediate filament networks in living cells. *The Journal of cell biology* 143(1):147-  
642 157.
- 643 36. Windoffer R & Leube RE (1999) Detection of cytokeratin dynamics by time-lapse  
644 fluorescence microscopy in living cells. *Journal of cell science* 112 ( Pt 24):4521-4534.
- 645 37. Moch M, Herberich G, Aach T, Leube RE, & Windoffer R (2013) Measuring the  
646 regulation of keratin filament network dynamics. *Proc Natl Acad Sci USA*  
647 110(26):10664-10669.
- 648 38. Schwarz N, Windoffer R, Magin TM, & Leube RE (2015) Dissection of keratin network  
649 formation, turnover and reorganization in living murine embryos. *Sci Rep* 5:9007.
- 650 39. Hollenbeck PJ, Bershadsky AD, Pletjushkina OY, Tint IS, & Vasiliev JM (1989)  
651 Intermediate filament collapse is an ATP-dependent and actin-dependent process.  
652 *Journal of cell science* 92 ( Pt 4):621-631.
- 653 40. Helfand BT, Mikami A, Vallee RB, & Goldman RD (2002) A requirement for  
654 cytoplasmic dynein and dynactin in intermediate filament network assembly and  
655 organization. *The Journal of cell biology* 157(5):795-806.
- 656 41. Xia C-H, *et al.* (2003) Abnormal neurofilament transport caused by targeted disruption of  
657 neuronal kinesin heavy chain KIF5A. *The Journal of cell biology* 161(1):55-66.
- 658 42. Herrmann H, Kreplak L, & Aebi U (2004) Isolation, characterization, and in vitro  
659 assembly of intermediate filaments. *Methods Cell Biol* 78:3-24.
- 660 43. Sanghvi-Shah R & Weber GF (2017) Intermediate Filaments at the Junction of  
661 Mechanotransduction, Migration, and Development. *Front Cell Dev Biol* 5:81.
- 662 44. Georgakopoulou S, Möller D, Sachs N, Herrmann H, & Aebi U (2009) Near-UV circular  
663 dichroism reveals structural transitions of vimentin subunits during intermediate filament  
664 assembly. *J. Mol. Biol.* 386(2):544-553.
- 665

666

667 SUPPLEMENTAL MATERIAL  
668

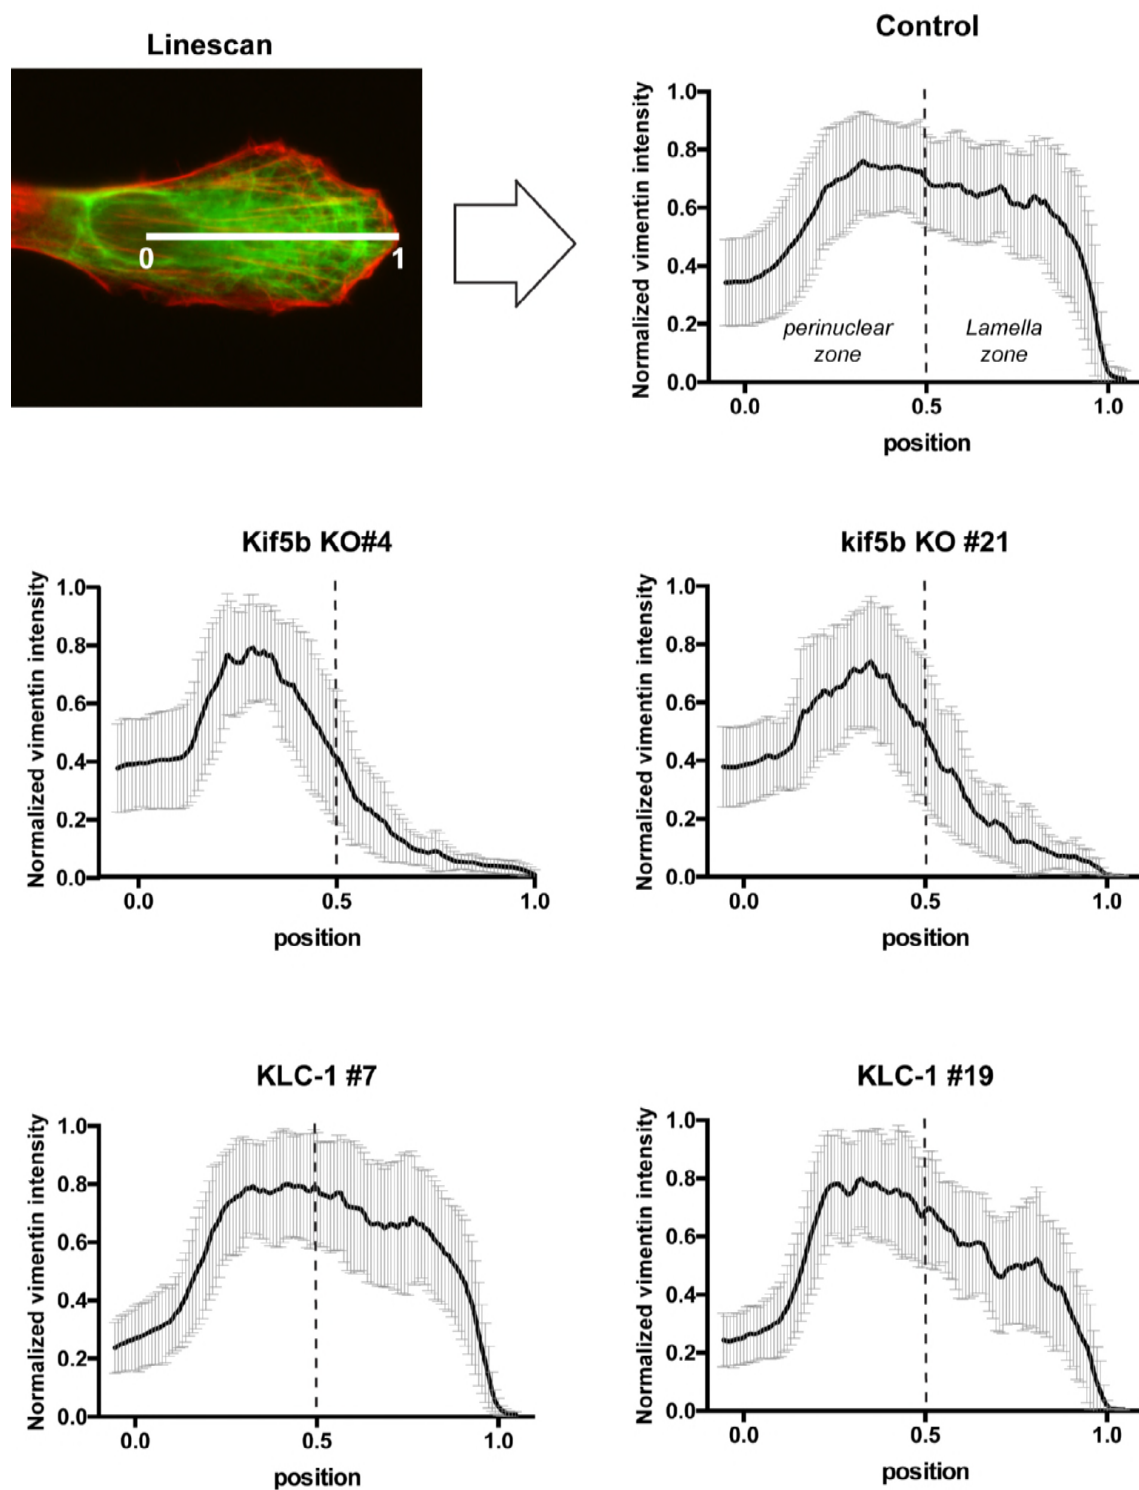

669  
670 **Figure S1. Plot profile analysis of filament distribution.** The illustration show an example of  
671 two-color image used for the quantification. The red channel (F-actin labeling) was used to

672 *trace a 3 pixels-wide line from position 0 (middle of the nucleus) and 1 (cell edge). The intensity*  
673 *profile fro the green channel (vimentin staining) along that line was obtained using the plot*  
674 *profile plugin in FIJI. The results were normalized using MatLab and each graph represents the*  
675 *normalized data from at least 30 cells per condition. The dashed line represents the midpoint of*  
676 *the line that was used to separate the element present at the cell edge (between 0.5 to 1) from the*  
677 *element in the perinuclear region (between 0 and 0.5). These graph were used to calculate the*  
678 *area under the curve at the cell edge versus total presented in figure 1. The same method was*  
679 *used to quantify the distribution of keratin (Figure 2) and mitochondria (Figure S2).*  
680

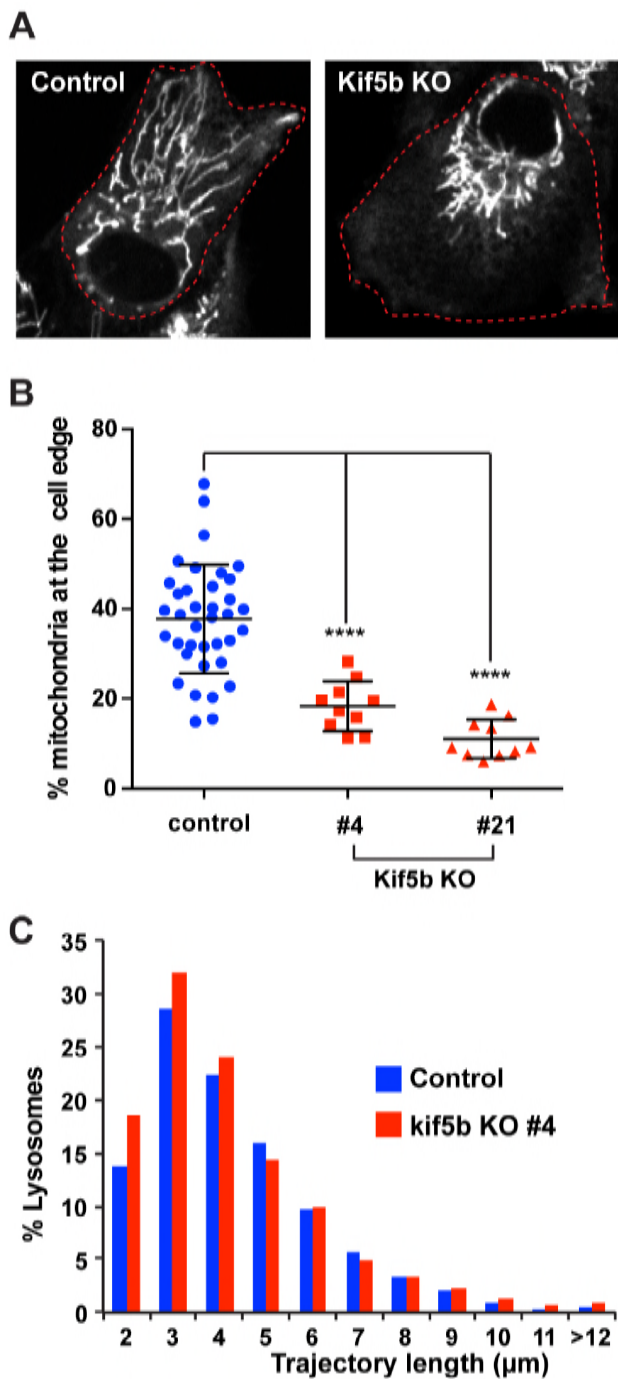

**Figure S2. KIF5B KO affects mitochondria distribution but not lysosome transport.** A) RPE WT and KIF5B KO were incubated with MitoTracker Deep red (1:20 000 for 10 minutes) and observed by confocal microscopy. The red dashed lines delineate the cell periphery. B) Mitochondria distribution was quantified as described for vimentin and keratin except that phase contrast images were used to determine the cell edges. The graph shows the depletion of mitochondria from the cell edge in two different KIF5B KO clones (#4 and #21). Statistical significance was determined using Mann-Whitney test (\*\*\*\*;  $p < 0.0001$ ). C) RPE WT and KIF5B KO were incubated with LysoTracker Deep red (1:50 000 for 10 minutes) and lysosomes were imaged by confocal microscopy every second for 1 minutes. The lysosome trajectory length was measured in 11 cells per condition ( $n > 2500$  lysosomes).

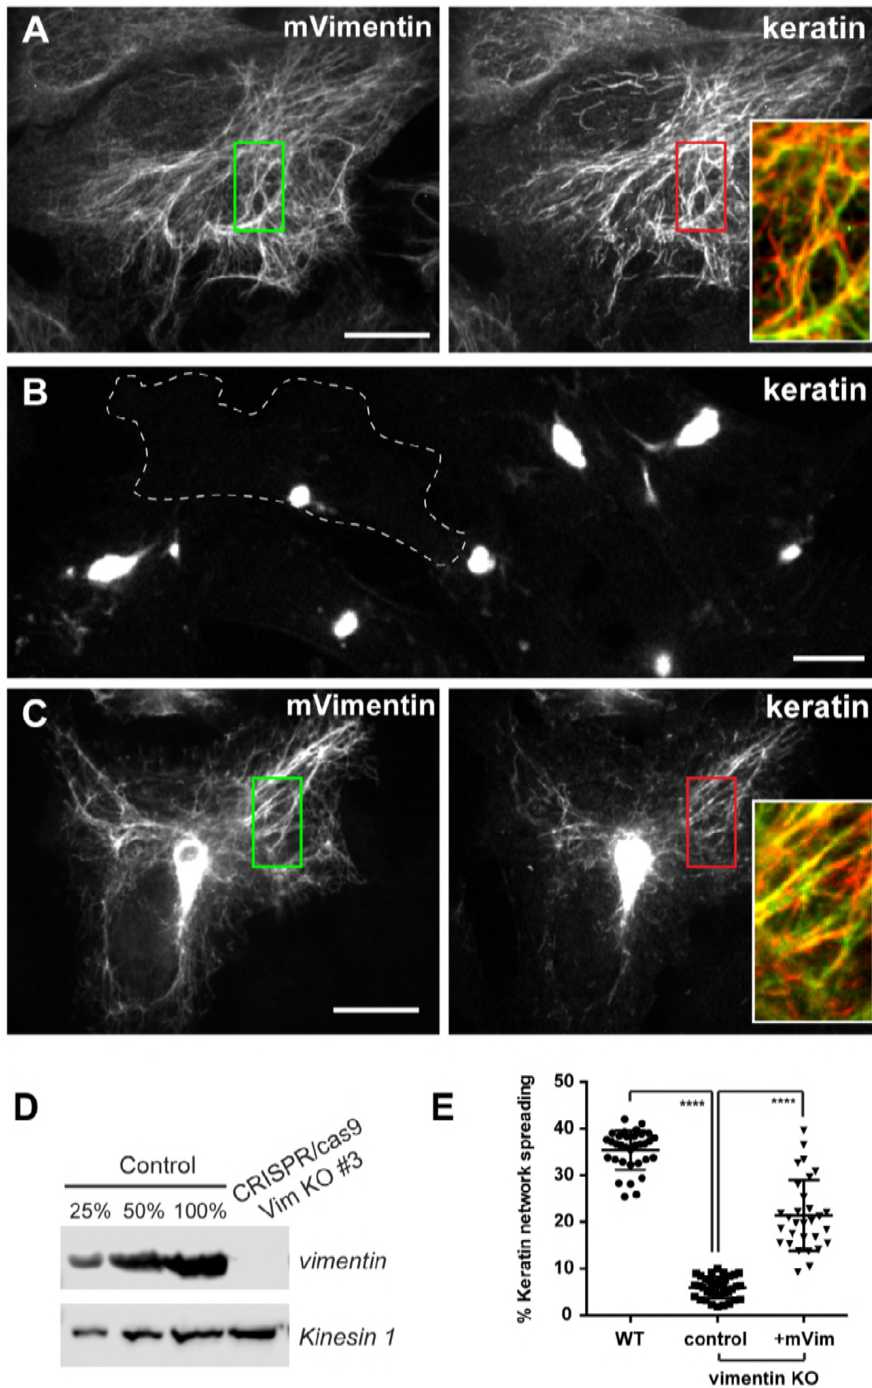

706

707 **Figure S3. Keratin filaments collapse in absence of vimentin in RPE cells.** A-C) Confocal  
708 images of keratin and vimentin immunostaining in RPE WT (A), vimentin KO (B) or vimentin KO  
709 expressing mVimentin (C). The boundary of on cell in (B) was delineated with a dashed line to  
710 highlight the intensity of the keratin filaments collapse. Enlargements of the inset emphasize the  
711 connection between the two networks. Bars, 10 $\mu$ m. D) Western blot analyses using vimentin

712 *antibody shows the absence of vimentin in clone #3 after vimentin KO using CRISPR/cas9.*  
713 *Kinesin-1 is used as loading control. E) The percentage of keratin network spreading represent*  
714 *the fraction of the keratin staining coverage for each cell for at least 30 cells per conditions.*  
715 *Statistical significance was determined using the Mann-Whitney test (\*\*\*\*;  $p < 0.0001$ ).*

716

717 **Video S1.** Vimentin filaments are transported in RPE cells. A 10  $\mu$ m-diameter area of a  
718 mEos3.2-vimentin expressing cell was photoconverted from green to red with 405nm light (see  
719 cyan circle). The movie shows the transport of red vimentin filaments outside of the  
720 photoconverted area every 20 sec after photoconversion for 3 min.

721

722 **Video S2.** KIF5B KO inhibites vimentin filaments transport. A 10  $\mu$ m-diameter area of a *KIF5B*  
723 KO RPE cells expressing mEos3.2-vimentin was photoconverted from green to red with 405nm  
724 light (see cyan circle). Pictures of the red channel were taken every 20 minutes for 3 min. The  
725 movie shows that vimentin filaments are confined inside the photoconverted area when KIF5B is  
726 absent.

727

728 **Video S3.** Keratin filaments are transported in RPE cells. A 10  $\mu$ m-diameter area of a mEos3.2-  
729 keratin expressing cell was photoconverted from green to red with 405nm light (see cyan circle).  
730 The movie shows the transport of red vimentin filaments outside of the photoconverted area  
731 every 15 sec after photoconversion for 3 min.

732

733 **Video S4.** Keratin filament transport requires microtubules. mEos3.2-keratin expressing cells  
734 were treated with 10 $\mu$ M nocodazole for 3h to depolymerize microtubules. A 10  $\mu$ m-diameter  
735 area of a nocodazole-treated cell was photoconverted from green to red with 405nm light (see

736 cyan circle). Pictures of the red channel were taken every 20 minutes for 3 min. The movie  
737 shows that keratin filaments are confined inside the photoconverted area in absence of  
738 microtubules.

739

740 **Video S5.** KIF5B KO inhibites keratin filaments transport. A 10  $\mu$ m-diameter area of a *KIF5B*  
741 KO RPE cells expressing mEos3.2-keratin was photoconverted from green to red with 405nm  
742 light (see cyan circle). Pictures of the red channel were taken every 20 minutes for 3 min. The  
743 movie shows that keratin filaments are confined inside the photoconverted area when KIF5B is  
744 absent.

745

746 **Video S6.** Keratin filaments are transported in A549 cells. A 10  $\mu$ m-diameter area of a mEos3.2-  
747 keratin expressing cell was photoconverted from green to red with 405nm light (see cyan circle).  
748 Pictures of the red channel were taken every 20 sec after photoconversion for 3 min. The red  
749 arrows point some red keratin filaments that are being transported outside of the photoconverted  
750 area.

751

752 **Video S7.** Keratin filaments are transported in absence of vimentin in A549 cells. A 10  $\mu$ m-  
753 diameter area of a vimentin KO A549 cells expressing mEos3.2-keratin was photoconverted  
754 from green to red with 405nm light (see cyan circle). Pictures of the red channel were taken  
755 every 20 minutes for 3 min. The red arrows point some red keratin filaments that are being  
756 transported outside of the photoconverted area even in cells lacking vimentin.

757

758
